# Supplementary material for: Preferential face deposition of gold nanoparticles on silicon nanowires by galvanic displacement
Source: Royal Society of Chemistry journal article supplement (doi:10.1039/c2ce25254f), 2012-01-01
Supplement: c2ce25254f.pdf [file c2ce25254f.pdf]

# Preferential Face Deposition of Gold Nanoparticles on Silicon Nanowires by Galvanic Displacement

Sayed Youssef Sayed,<sup>1,2</sup> Feng Wang,<sup>1</sup> Marek Malac,<sup>1</sup> Peng Li,<sup>1</sup> Dong  
Wang,<sup>1,2</sup> Jillian Buriak<sup>1,2\*</sup>

<sup>1</sup> National Institute for Nanotechnology, Edmonton, 11421 Saskatchewan Drive, T6G 2M9,  
Canada.

<sup>2</sup> Dept of Chemistry, University of Alberta, Edmonton, T6G 2G2, Canada.

---

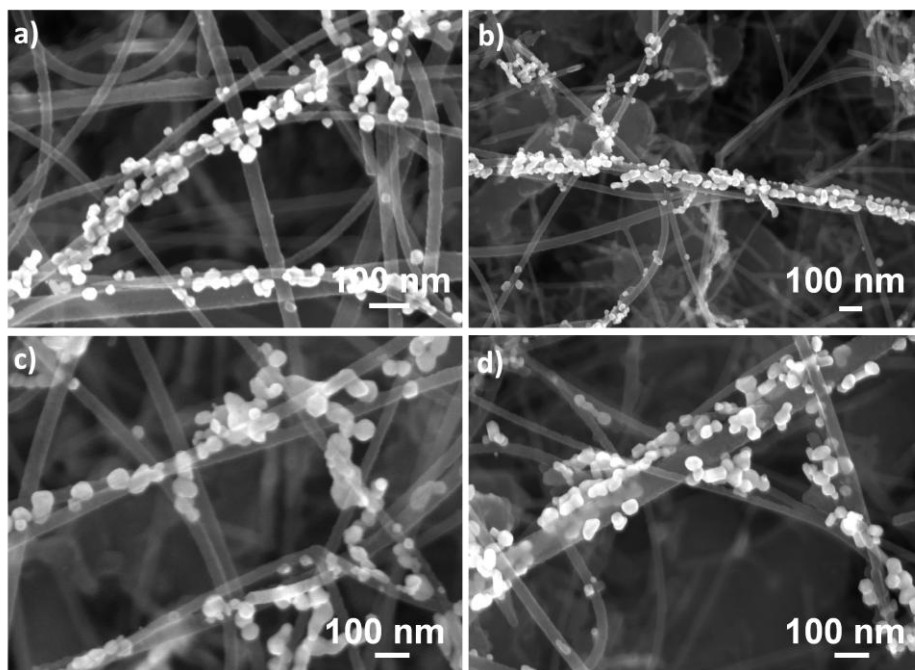

**Figure S1.** Scanning electron micrographs for Au galvanically displaced on Si NWs with 1 mM  $\text{KAuCl}_4$  (aq) for 30 s (a), 60 s (b), 90 s (c), and 120 s (d).

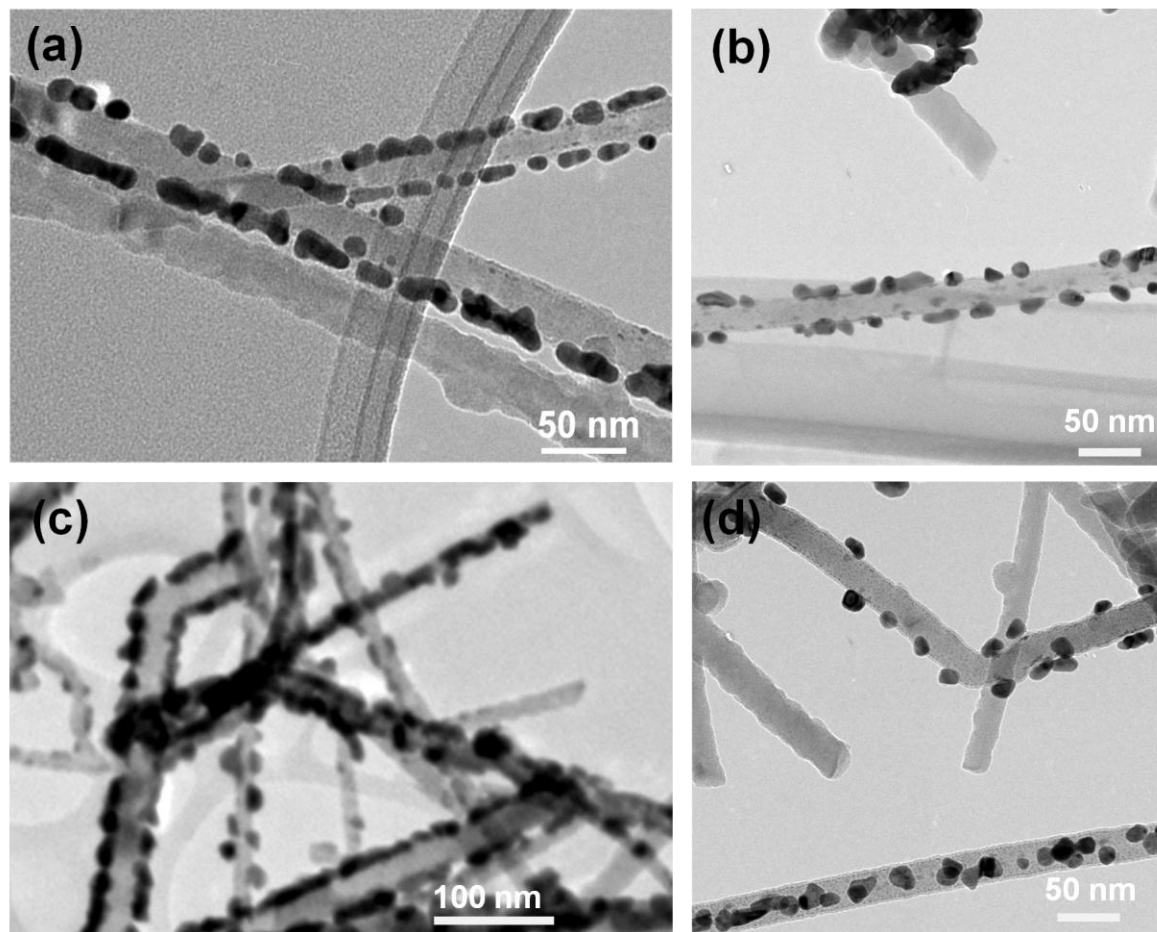

**Figure S2.** Bright field TEM images for gold nanoparticles grown, by galvanic displacement, on Si NWs after being in contact to a drop containing [1 mM  $\text{KAuCl}_4$  (aq) + 1% HF (aq)] for 30 s.

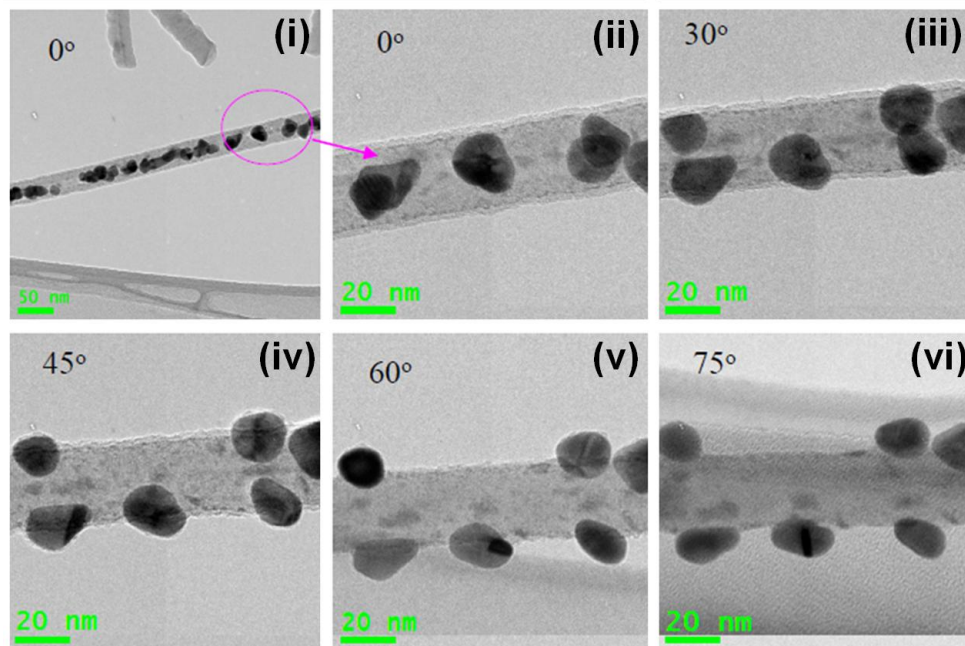

**Figure S3.** Bright-field TEM micrographs of Au nanoparticles on a Si nanowire at different degrees of sample tilting starting from 0° to 75° at 15° tilting steps.

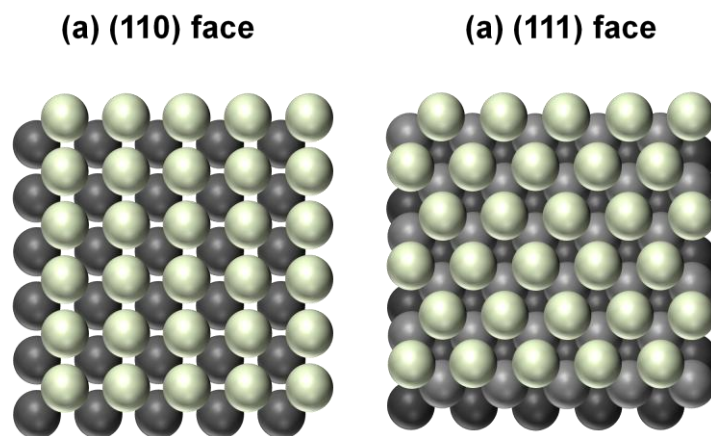

**Figure S4.** (a), and (b) Atomic models for Si(110) and Si(111) surfaces, respectively.

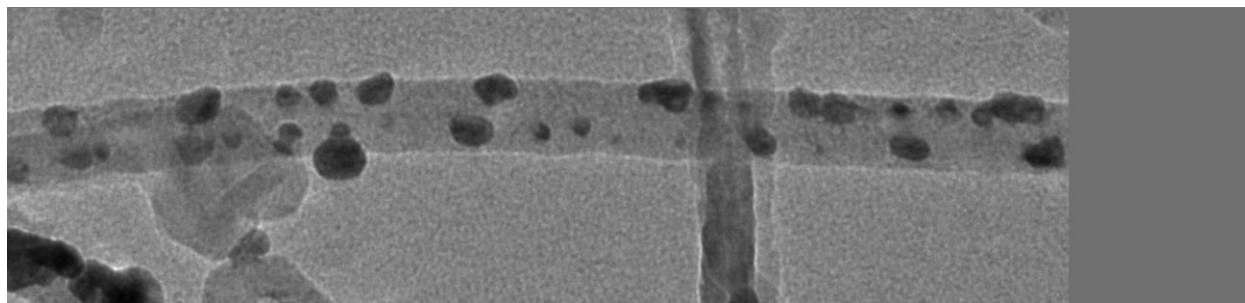

**Figure S5.** Image from the accompanying video showing observed by reconstruction of data taken from TEM tomography showing the preferential deposition of gold nanoparticles on specific sides of Si NWs

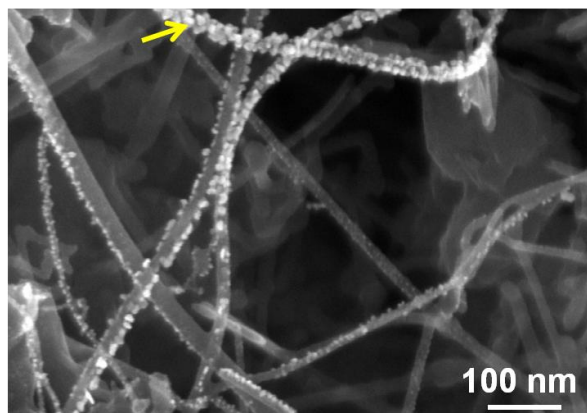

**Figure S6.** Scanning electron micrograph for gold nanoparticles grown by galvanic displacement on Si NWs after 30 s exposure to a mixture of 1 mM  $\text{KAuCl}_4$  (aq) and 1% HF (aq). Yellow arrow refers to a Si nanowire showing no preferential gold deposition.

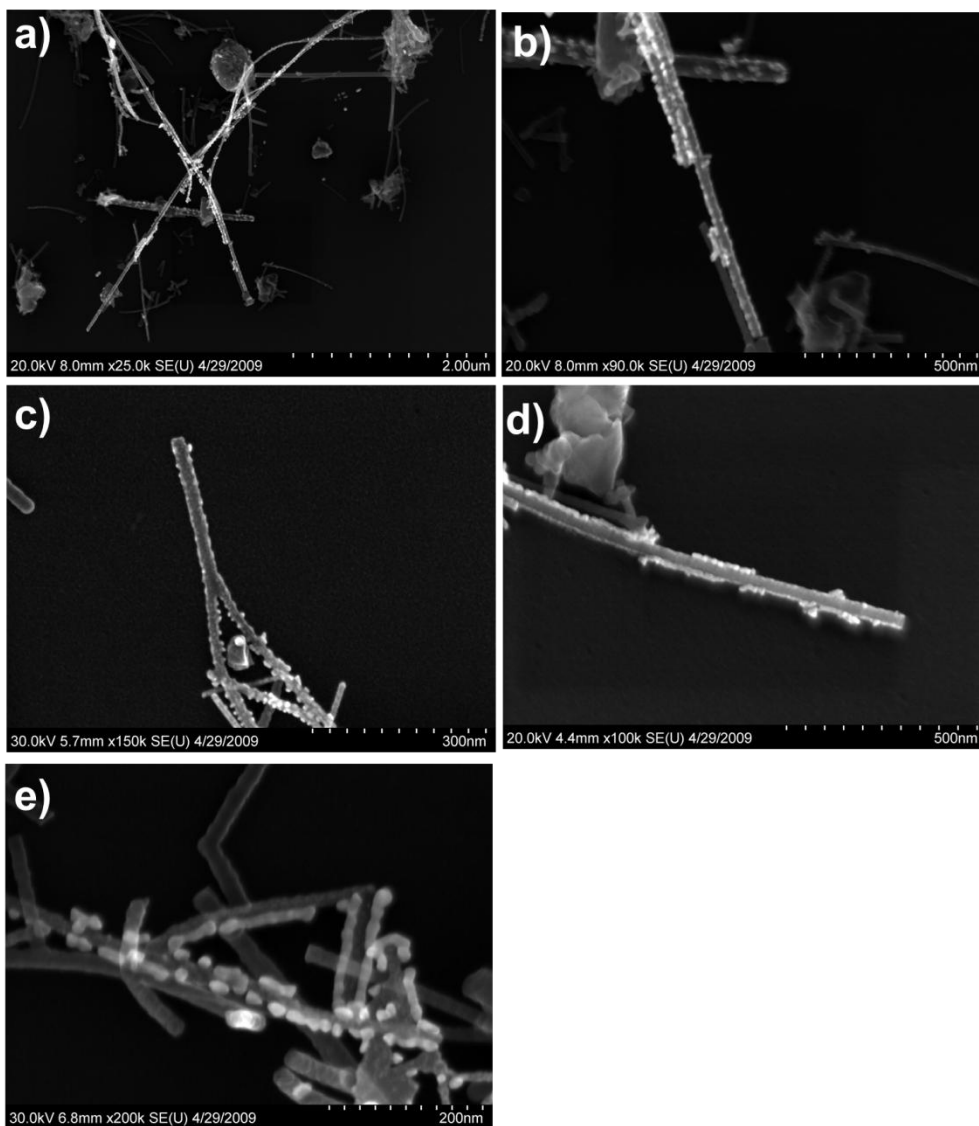

**Figure S7.** Scanning electron micrograph for gold nanoparticles grown by galvanic displacement on Si NWs after 20 s exposure to a mixture of 1 mM KAuCl<sub>4</sub> (aq) and 1% HF (aq).

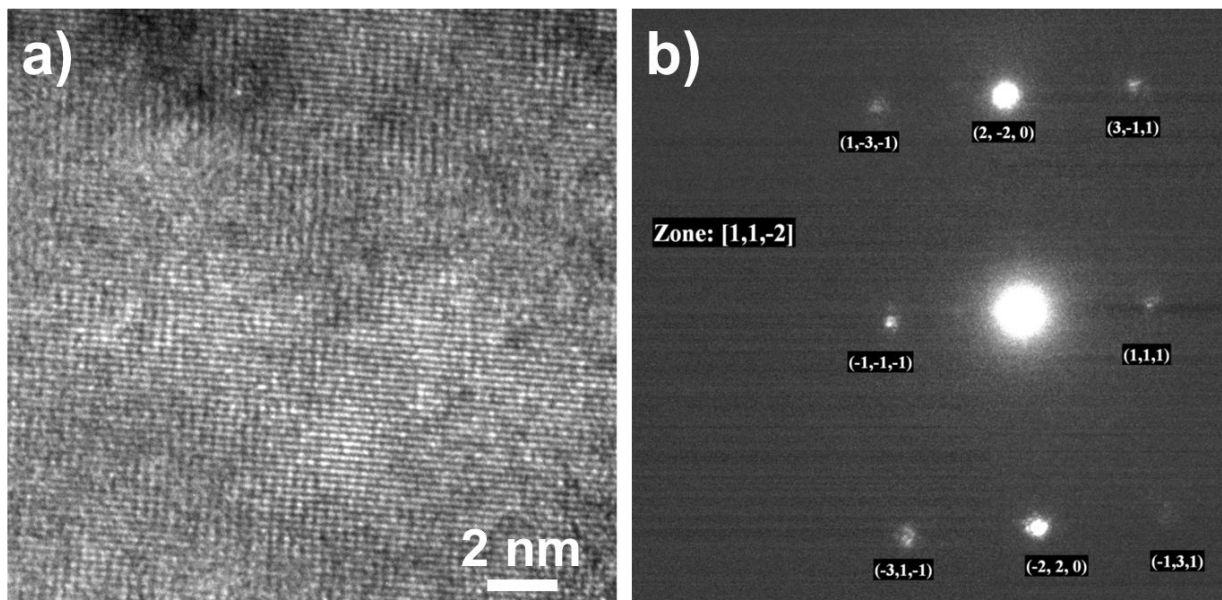

**Figure S8.** a) Cross-sectional high resolution TEM image for a Si NW taken along the  $[11\bar{2}]$  zone axis. b) Selected area electron diffraction (SAED) pattern taken along  $[11\bar{2}]$  zone axis.
